# Supplementary material for: Satb2 determines miRNA expression and long-term memory in the adult central nervous system
Source: eLife. 2016 Nov 29;5:e17361. doi: 10.7554/eLife.17361 (PMC5207769; doi:10.7554/eLife.17361)
Supplement: Figure 5—source data 1. — DOI: http://dx.doi.org/10.7554/eLife.17361.012 [file elife-17361-fig5-data1.xlsx]

## Sheet: Sheet1
Category	GO term	P value	FDR	Odds.Ratio
KEGG Pathway	Long-term potentiation	1.35838e-05	0.000508034	3.20626
	Tight junction	4.50667e-05	0.00120392	2.38737
	MAPK signaling pathway	5.45599e-05	0.00127534	1.82622
	Insulin signaling pathway	0.000610887	0.00977877	1.97301
	Axon guidance	0.000627515	0.00977877	2.01803
GO Cellular Component	chromosomal part	5.42354e-12	2.25432e-09	2.0577
	transcription factor complex	1.04367e-11	2.25432e-09	2.33549
	dendrite	2.47965e-09	3.5707e-07	1.99444
	chromatin	3.76038e-08	3.26378e-06	2.15357
	chromatin remodeling complex	3.77752e-08	3.26378e-06	3.09034
	nuclear chromosome	7.72666e-08	5.5632e-06	2.12636
	nuclear chromosome part	2.01575e-07	1.24401e-05	2.16559
	dendritic spine	3.70128e-07	1.99869e-05	2.42506
	nuclear body	4.34115e-07	2.08375e-05	2.40204
	transcriptional repressor complex	5.73141e-07	2.33863e-05	4.00611
GO Molecular Function	protein binding transcription factor activity	2.16726e-21	1.75114e-18	3.02851
	transcription cofactor activity	3.19506e-20	1.2908e-17	3.07848
	transcription factor binding transcription factor activity	1.05631e-19	2.845e-17	2.95653
	protein kinase binding	4.5928e-17	8.83376e-15	2.58774
	transcription factor binding	5.46643e-17	8.83376e-15	2.52735
	kinase binding	4.07501e-16	5.48768e-14	2.42092
	ligase activity	4.92573e-16	5.6857e-14	2.44117
	transcription regulatory region DNA binding	3.86487e-14	3.90352e-12	2.55382
	regulatory region DNA binding	1.35175e-13	1.21357e-11	2.49052
	chromatin binding	4.25133e-13	3.43507e-11	2.58833
GO Biological Process	chromatin organization	3.3053e-23	1.24048e-19	2.77839
	chromatin modification	1.58282e-21	2.97016e-18	2.84008
	protein modification by small protein conjugation or removal	5.24729e-20	5.10234e-17	2.63637
	protein modification by small protein conjugation	5.43814e-20	5.10234e-17	2.84054
	regulation of nervous system development	1.16297e-19	8.72925e-17	2.5261
	protein ubiquitination	7.39815e-17	4.62754e-14	2.69837
	regionalization	1.97434e-15	9.62731e-13	2.76594
	pattern specification process	2.05218e-15	9.62731e-13	2.42946
	regulation of neurogenesis	3.29194e-15	1.37274e-12	2.35681
	tube development	5.99176e-15	2.09646e-12	2.36582
