# Supplementary material for: Satb2 determines miRNA expression and long-term memory in the adult central nervous system
Source: eLife. 2016 Nov 29;5:e17361. doi: 10.7554/eLife.17361 (PMC5207769; doi:10.7554/eLife.17361)
Supplement: Figure 6—source data 1. — Shown are the genomic coordinates of the identified Satb2 binding sites and the distance to the TSS of the corresponding gene. DOI: http://dx.doi.org/10.7554/eLife.17361.018 [file elife-17361-fig6-data1.xlsx]

## Sheet: Sheet1
Gene Symbol	Base Mean	log2 Fold Change	padj	Chr	Satb2 peak-start	Satb2 peak-end	Distance to TSS (bp)	Algorithm	Score
Scin	35.5025	1.5046	3.47223e-08	chr12	40133839	40133839	389	Macs2 (broad)	14
Cd36	107.195	1.18765	3.36365e-06		NA	NA
Plcz1	78.0069	0.923178	2.1816e-16	chr6	140048926	140049096	-7509	Homer (broad)	15.1
Adra2a	450.351	0.902223	2.36657e-12	chr19	54045182	54048982	298	Macs2 (narrow)	59.4
Penk	981.435	0.835364	1.1731e-14	chr4	4133536	4138445	-1117	Macs2 (broad)	67
Sema3a	142.001	0.786906	0.000354718	chr5	13398950	13399120	-2166	Homer (narrow)	13.2
Dnah8	26.9657	0.748964	0.00122366		NA	NA
Podn	127.601	0.720403	8.18736e-05	chr4	108014793	108032090	0	Macs2 (narrow)	44.9
Zfp423	371.064	0.705867	8.81989e-13	chr8	87661810	87959595	817	Macs2 (broad)	13.2
Ppef2	20.6018	0.70402	0.0385372	chr5	92226974	92256278	-808	Macs2 (broad)	8
Six4	44.4235	0.70372	0.00587776	chr12	73100259	73113245	1368	Macs2 (broad)	10
AC138457.1	39.4463	0.688377	0.0150043		NA	NA
Nog	76.0733	0.646427	3.16101e-05	chr11	89300638	89302559	0	Macs2 (broad)	17
Lsm11	703.368	0.608425	1.03797e-05	chr11	45928269	45944935	0	Macs2 (broad)	15
Htr5b	231.575	0.600376	0.026257	chr1	121509773	121528465	1122	Macs2 (broad)	8
Rxrg	162.283	0.585407	0.00108779	chr1	167598362	167639623	282	Macs2 (broad)	19
Nrip3	4452.59	0.575029	5.51772e-29		NA	NA
1110017D15Rik	25.9419	0.574613	0.036344		NA	NA
Hrk	1754.55	0.558175	1.69905e-09	chr5	118169764	118189478	2072	Macs2 (broad)	16
Nt5dc3	6090.25	0.5546	3.56366e-20	chr10	86778405	86779405	-600	Homer (broad)	34.1
Vstm2l	841.372	0.552639	0.000647347	chr2	157914441	157915441	-212	Homer (broad)	31.1
Oxtr	233.422	0.53656	8.18736e-05	chr6	112489592	112491192	-1600	Homer (broad)	47.3
Calb1	3678.44	0.528165	2.89258e-11		NA	NA
Crym	6089.69	0.516797	3.1444e-14	chr7	120186384	120201988	0	Macs2 (broad)	18
Tmem196	54.4216	0.507705	0.016006		NA	NA
Kcnb2	57.8898	-0.538339	0.000528244		NA	NA			11
Ramp3	52.6719	-0.539983	0.036776	chr11	6657928	6658928	-395	Homer (broad)	30.3
Flt3l	46.9051	-0.557204	0.0326227	chr7	45131684	45136084	0	Macs2 (broad)	19
Kcnb2	156.708	-0.594074	9.11116e-06	chr1	15312452	15714214	-26072	Macs2 (broad)	11
Actn2	171.501	-0.59415	0.0117245	chr13	12340312	12341312	-580	Homer (broad)	39.7
Grem1	238.848	-0.705284	0.0162261	chr2	113748675	113758648	0	Macs2 (broad)	14
Satb2	395.893	-0.779672	0.00248946		NA	NA
Wnt11	16.0081	-0.942523	0.0206598	chr7	98835112	98854747	-193	Macs2 (narrow)	52
Lgr6	13.901	-0.959644	0.0253642	chr1	134986353	135105276	0	Macs2 (narrow)	35
Col5a2	169.313	-0.966675	3.34875e-12		NA	NA
Tecta	20.7987	-0.980234	0.036344	chr9	42329622	42343994	-4242	Macs2 (narrow)	45
Oxr1	4937.67	-1.03669	5.356e-54	chr15	41449027	41820578	751	Macs2 (narrow)	78
Cpne9	62.5218	-1.12178	0.0428788	chr6	113282307	113283982	7208	Macs2 (broad)	8
Ghsr	16.2852	-1.17118	0.000180228	chr3	27371351	27378010	621	Macs2 (narrow)	27
Capn11	25.8754	-1.98864	0.00103983	chr17	45630204	45659309	-3809	Macs2 (broad)	12

## Sheet: Sheet2
1.5046
1.18765
0.923178
0.902223
0.835364
0.786906
0.748964
0.720403
0.705867
0.70402
0.70372
0.688377
0.646427
0.608425
0.600376
0.585407
0.575029
0.574613
0.558175
0.5546
0.552639
0.53656
0.528165
0.516797
0.507705
-0.538339
-0.539983
-0.557204
-0.594074
-0.59415
-0.705284
-0.779672
-0.942523
-0.959644
-0.966675
-0.980234
-1.03669
-1.12178
-1.17118
-1.98864
