# Supplementary material for: Satb2 determines miRNA expression and long-term memory in the adult central nervous system
Source: eLife. 2016 Nov 29;5:e17361. doi: 10.7554/eLife.17361 (PMC5207769; doi:10.7554/eLife.17361)
Supplement: Figure 6—source data 2. — Only one gene showed differential exon usage at FDR corrected p-value significance level 0.01 and 12 genes at FDR 0.1 (based on DEXSeq R-package with default parameters). DOI: http://dx.doi.org/10.7554/eLife.17361.019 [file elife-17361-fig6-data2.xlsx]

## Sheet: Sheet1
Gene name	ENSEMBL id	Exon	padj	log2fold-change (cKO vs. Ctrl.)	Chromosome	Start	End
NA	ENSMUSG00000093752+ENSMUSG00000078919+ENSMUSG00000051149	E002	0.000122568	0.0277872	chr2	168180989	168184967
NA	ENSMUSG00000026464+ENSMUSG00000094410	E018	0.0242532	-0.0721796	chr1	133655345	133661236
Aldoc	ENSMUSG00000017390	E019	0.0593374	0.0268758	chr11	78326262	78326708
NA	ENSMUSG00000005610+ENSMUSG00000088948	E046	0.0631544	-0.129741	chr7	111081507	111081571
Sptbn1	ENSMUSG00000020315	E023	0.0631544	-0.085066	chr11	30120976	30121065
Atp5b	ENSMUSG00000025393	E008	0.0631544	-0.0292401	chr10	128085091	128085212
Itpka	ENSMUSG00000027296	E001	0.0631544	0.14517	chr2	119742337	119742861
Snapc3	ENSMUSG00000028483	E021	0.0631544	-0.0672631	chr4	83463976	83465964
Megf11	ENSMUSG00000036466	E043	0.0631544	-0.103106	chr9	64707291	64709205
Fam134a	ENSMUSG00000049339	E006	0.0631544	-0.0848007	chr1	75144960	75145103
NA	ENSMUSG00000086873+ENSMUSG00000025855	E014	0.0631544	-0.0820782	chr5	139063256	139063317
Pigk	ENSMUSG00000039047	E028	0.06508	0.113774	chr3	152840076	152841763
Psma6	ENSMUSG00000021024	E003	0.0651986	-0.0926226	chr12	55398795	55398991
Mt1	ENSMUSG00000031765	E001	0.0651986	-0.021552	chr8	94179089	94179338
Gm16054	ENSMUSG00000087431	E002	0.0651986	0.0314616	chr5	81794467	81795592
Ppp1r9b	ENSMUSG00000038976	E010	0.0939877	-0.0284228	chr11	95001842	95001994
