# Supplementary material for: Satb2 determines miRNA expression and long-term memory in the adult central nervous system
Source: eLife. 2016 Nov 29;5:e17361. doi: 10.7554/eLife.17361 (PMC5207769; doi:10.7554/eLife.17361)
Supplement: Figure 6—source data 3. — DOI: http://dx.doi.org/10.7554/eLife.17361.020 [file elife-17361-fig6-data3.xlsx]

## Sheet: Sheet1
Feature	Base Mean	log2 FoldChange	padj
mmu-miR-221-5p	426.491	2.92053	6.48795e-22
mmu-miR-409-5p	1067.59	2.87487	5.15573e-10
mmu-miR-183-5p	173.604	2.7866	2.54338e-06
mmu-miR-344d-3-5p	23.5376	2.71865	1.44641e-07
mmu-miR-125b-2-3p	1117.26	2.69776	2.02425e-14
mmu-miR-1957a	41.6677	2.67844	4.85926e-08
mmu-miR-582-3p	373.998	2.67812	9.39228e-08
mmu-miR-383-5p	455.637	2.63411	8.0364e-09
mmu-miR-143-3p	20568	2.59286	7.08039e-13
mmu-miR-434-5p	2313.18	2.55943	4.44057e-18
mmu-miR-540-3p	294.933	2.42151	1.655e-07
mmu-miR-431-3p	294.257	2.37321	2.68461e-08
mmu-miR-676-3p	1281.87	2.29669	1.38476e-08
mmu-miR-5099	49.911	2.27968	1.25298e-07
mmu-miR-540-5p	20.3412	2.22712	4.48416e-08
mmu-miR-7019-3p	26.4317	2.19393	6.19202e-06
mmu-miR-370-3p	473.428	2.09588	3.00818e-10
mmu-miR-501-3p	498.316	2.09265	5.04896e-07
mmu-miR-410-3p	6729.7	1.95053	1.14404e-09
mmu-miR-127-5p	428.71	1.91267	5.21378e-08
mmu-miR-199a-5p	11.2483	1.90041	1.28488e-07
mmu-miR-6236	37.6304	1.89828	0.00693731
mmu-miR-182-5p	1116.03	1.8922	0.000113198
mmu-miR-7240-5p	13.0622	1.83939	0.000508397
mmu-miR-679-5p	24.7464	1.81305	0.000135836
mmu-miR-770-5p	101.09	1.77322	9.93198e-07
mmu-miR-1247-5p	163.4	1.7545	6.22743e-09
mmu-miR-141-3p	27.1929	1.74838	0.0213405
mmu-miR-100-5p	13091.8	1.74837	5.66923e-09
mmu-miR-381-3p	4414.74	1.74396	2.46229e-07
mmu-let-7i-3p	29.3903	1.72763	2.00098e-09
mmu-miR-148a-3p	3014.16	1.70645	1.11993e-11
mmu-miR-185-3p	14.2677	1.70145	7.6724e-05
mmu-miR-99a-3p	36.0504	1.69657	1.15801e-09
mmu-miR-22-3p	48402.6	1.69569	2.12043e-07
mmu-miR-873a-3p	179.169	1.67455	1.0011e-09
mmu-miR-1943-5p	14.4832	1.67317	0.000923261
mmu-miR-485-5p	720.987	1.66671	3.28971e-08
mmu-miR-1298-3p	172.497	1.66563	1.01306e-05
mmu-miR-350-5p	21.3529	1.65497	0.000174846
mmu-miR-345-3p	51.0659	1.61719	4.52604e-09
mmu-miR-666-5p	685.369	1.59845	7.22406e-11
mmu-miR-423-3p	384.991	1.54641	4.85719e-05
mmu-miR-222-3p	7841.63	1.5294	2.0228e-07
mmu-miR-322-5p	153.886	1.52716	2.68461e-08
mmu-miR-346-5p	203.349	1.52578	2.69203e-07
mmu-miR-125a-5p	61387.7	1.51486	3.7325e-08
mmu-miR-92a-3p	3345.99	1.49859	1.37968e-07
mmu-miR-344-3p	81.4832	1.49667	2.41485e-07
mmu-miR-351-5p	670.978	1.49413	6.22743e-09
mmu-miR-344b-3p	73.5214	1.4788	2.5582e-05
mmu-miR-124-3p	17917	1.4541	3.52181e-08
mmu-miR-27b-3p	40381.7	1.42995	3.66256e-07
mmu-miR-30a-3p	1024.27	1.42575	3.48481e-06
mmu-miR-674-3p	385.403	1.42337	9.57401e-11
mmu-miR-874-3p	782.618	1.39722	1.00082e-06
mmu-miR-28a-3p	36.6062	1.39163	2.60295e-05
mmu-miR-99b-5p	54751.6	1.38437	1.54015e-05
mmu-miR-3082-3p	85.4654	1.34661	5.21378e-08
mmu-miR-6239	84.0461	1.32067	0.000125021
mmu-miR-6896-5p	13.8795	1.28418	0.00186887
mmu-miR-3093-5p	66.951	1.25408	0.000310838
mmu-miR-153-3p	2212.48	1.24923	0.0096545
mmu-miR-145a-3p	101.565	1.2344	9.72485e-05
mmu-miR-5627-3p	11.7723	1.21299	0.00288744
mmu-miR-362-5p	10.6921	1.20648	0.00104311
mmu-miR-137-5p	14.4718	1.19389	0.00306668
mmu-miR-3059-5p	439.616	1.1785	6.43666e-05
mmu-miR-335-3p	599.266	1.17088	1.76807e-08
mmu-miR-125b-5p	50146.3	1.14468	6.26388e-06
mmu-miR-671-5p	46.4248	1.14216	0.000122488
mmu-miR-3535	68.5769	1.14008	3.03785e-05
mmu-miR-700-3p	18.592	1.12509	0.000404978
mmu-miR-1264-3p	19.7543	1.09928	0.000635079
mmu-miR-181c-3p	322.234	1.09106	4.92668e-05
mmu-miR-339-5p	30.2709	1.0801	3.57306e-05
mmu-miR-212-5p	1815.52	1.07928	8.09216e-05
mmu-miR-7226-3p	10.5461	1.07682	0.00384022
mmu-miR-3084-3p	34.429	1.07335	0.00435844
mmu-miR-326-3p	190.717	1.02399	2.74089e-06
mmu-miR-146a-5p	1637.48	0.98911	0.0084012
mmu-miR-30e-3p	1485.75	0.982236	6.80739e-05
mmu-miR-24-2-5p	107.967	0.979865	9.2935e-05
mmu-miR-125a-3p	62.8621	0.976797	0.00012485
mmu-miR-339-3p	25.9066	0.954769	0.000635079
mmu-miR-338-5p	218.538	0.937041	0.000560098
mmu-miR-101a-3p	1659.66	0.929085	0.0199586
mmu-miR-148a-5p	42.9905	0.902331	0.00247921
mmu-miR-7236-3p	11.1642	0.900968	0.0101322
mmu-miR-25-3p	1091.28	0.895216	1.34234e-06
mmu-miR-330-3p	609.604	0.887602	0.000478288
mmu-miR-491-5p	12.6887	0.872755	0.0298802
mmu-miR-1193-3p	14.6981	0.868123	0.0102423
mmu-miR-181a-2-3p	598.067	0.86106	0.00959955
mmu-miR-3071-3p	862.929	0.851527	7.08039e-13
mmu-miR-329-5p	163.181	0.835564	0.00287517
mmu-miR-140-3p	988.293	0.829287	0.00194185
mmu-miR-27b-5p	95.6141	0.827654	0.000894449
mmu-miR-330-5p	1595.2	0.820813	1.16413e-07
mmu-miR-222-5p	74.2343	0.816785	0.00460886
mmu-miR-770-3p	152.351	0.784056	0.0114361
mmu-miR-190a-5p	44.6297	0.770271	0.0305151
mmu-miR-1981-3p	138.012	0.769202	0.00958065
mmu-miR-132-3p	6436.4	0.757811	0.000174203
mmu-miR-186-5p	8393.26	0.752145	0.0127413
mmu-miR-872-5p	756.975	0.751667	1.4003e-05
mmu-miR-27a-3p	707.667	0.735492	0.000593079
mmu-miR-128-1-5p	727.633	0.683707	0.02538
mmu-miR-151-5p	14246.5	0.682092	0.00142764
mmu-miR-361-5p	1164	0.678572	0.0182737
mmu-miR-130a-3p	1105.33	0.671489	0.000145341
mmu-miR-139-3p	66.8397	0.666587	0.0150874
mmu-miR-181d-5p	1302.34	0.622275	0.00287517
mmu-miR-342-3p	1777.57	0.617864	0.00580113
mmu-let-7i-5p	16411.8	0.610688	0.0354344
mmu-miR-421-3p	908.238	0.584933	0.00100207
mmu-miR-3968	317.746	0.584235	0.0371966
mmu-miR-1947-5p	38.0806	0.550318	0.0298802
mmu-miR-146b-5p	4294.18	0.548187	0.0194024
mmu-miR-10a-5p	385.748	0.534482	0.0350138
mmu-miR-1981-5p	76.0902	0.534036	0.0459018
mmu-miR-3083-5p	39.2731	-0.503584	0.0197866
mmu-miR-320-3p	806.854	-0.507401	0.00316961
mmu-miR-7a-1-3p	130.542	-0.519707	0.0448286
mmu-miR-425-5p	1240.26	-0.523598	0.0487247
mmu-miR-139-5p	2341.7	-0.527155	0.000652232
mmu-miR-671-3p	1124.84	-0.536178	0.000352239
mmu-miR-325-5p	67.4424	-0.538832	0.0032605
mmu-miR-1249-3p	1886.15	-0.543651	0.0169615
mmu-miR-378a-3p	511.641	-0.562615	0.0350138
mmu-miR-431-5p	311.552	-0.575223	0.00530398
mmu-miR-3085-3p	80.0865	-0.587459	0.0455116
mmu-miR-22-5p	83.7611	-0.609018	0.000736677
mmu-miR-485-3p	630.466	-0.620377	0.00128355
mmu-miR-181b-5p	20619.8	-0.621776	0.00341504
mmu-miR-361-3p	418.647	-0.62705	6.19202e-06
mmu-miR-150-5p	2791.8	-0.632542	0.00287517
mmu-miR-702-3p	116.144	-0.63371	0.0354344
mmu-miR-3083-3p	17.0974	-0.637071	0.0235841
mmu-miR-8114	64.9828	-0.647132	0.0207046
mmu-miR-106b-5p	67.481	-0.652795	0.047809
mmu-miR-30b-3p	29.1553	-0.660889	0.0148698
mmu-miR-30b-5p	1814.22	-0.677073	0.0234457
mmu-miR-219a-2-3p	621.136	-0.689483	0.0161596
mmu-miR-369-5p	2187.96	-0.69375	0.00188842
mmu-miR-667-3p	934.292	-0.727559	3.77506e-05
mmu-let-7b-3p	756.984	-0.735429	4.65596e-06
mmu-miR-434-3p	63163.3	-0.742783	0.00381523
mmu-miR-411-3p	767.099	-0.743608	2.42672e-05
mmu-let-7j	21.6697	-0.747763	0.0203582
mmu-miR-7015-3p	110.636	-0.749286	0.0157619
mmu-miR-1224-3p	77.5761	-0.751419	0.00101283
mmu-miR-98-5p	3127.69	-0.75758	0.00313535
mmu-miR-412-5p	118.856	-0.763949	1.08919e-05
mmu-miR-6911-3p	20.0366	-0.765571	0.0178764
mmu-miR-376c-3p	171.705	-0.774975	0.0136742
mmu-miR-539-5p	41.8945	-0.785136	0.00160329
mmu-miR-154-5p	335.7	-0.797897	2.74089e-06
mmu-let-7c-1-3p	20.5783	-0.809819	0.0165981
mmu-miR-323-3p	529.203	-0.814023	3.29019e-08
mmu-let-7g-5p	26431.7	-0.816663	9.05088e-07
mmu-miR-192-5p	6267.51	-0.82544	9.22349e-05
mmu-miR-134-5p	478.099	-0.832428	1.76807e-08
mmu-miR-3068-3p	140.525	-0.832543	0.00477719
mmu-miR-300-5p	14.8777	-0.832852	0.0199586
mmu-miR-31-5p	590.964	-0.835474	0.000257394
mmu-miR-1839-5p	43.2054	-0.851603	0.0058533
mmu-miR-3057-5p	144.218	-0.85345	3.0246e-05
mmu-miR-124-5p	96.4422	-0.881805	0.00107935
mmu-let-7d-5p	12035.4	-0.884078	1.78078e-05
mmu-miR-3475-3p	796.095	-0.8938	4.62898e-05
mmu-miR-350-3p	28.523	-0.922089	0.000250004
mmu-miR-598-3p	1033.71	-0.922319	0.000528166
mmu-miR-411-5p	31781.6	-0.93159	0.00232853
mmu-miR-6914-3p	12.366	-0.953776	0.0163386
mmu-miR-764-5p	19.9058	-0.959808	0.00205381
mmu-let-7d-3p	2700.02	-0.961377	5.07322e-07
mmu-miR-218-5p	7508.03	-0.96697	8.64385e-06
mmu-miR-19b-3p	116.128	-0.993269	0.0305151
mmu-let-7a-5p	45174.6	-1.03417	3.25168e-05
mmu-miR-3102-3p.2-3p	127.855	-1.04536	1.41445e-11
mmu-miR-7046-3p	51.0105	-1.07508	4.85719e-05
mmu-miR-219a-1-3p	18.0923	-1.08922	4.84146e-05
mmu-let-7e-3p	205.218	-1.09018	5.60407e-12
mmu-miR-28a-5p	199.291	-1.09144	2.32742e-09
mmu-miR-382-3p	127.769	-1.10807	1.30011e-05
mmu-miR-433-5p	153.292	-1.11392	2.00383e-05
mmu-miR-21a-5p	4371.56	-1.15953	0.000893782
mmu-miR-5129-3p	49.3319	-1.18187	1.29982e-07
mmu-miR-592-5p	212.512	-1.18434	0.0096545
mmu-miR-384-5p	1775.5	-1.18995	6.12154e-06
mmu-miR-493-5p	69.6573	-1.19106	1.35938e-08
mmu-miR-301a-3p	1946.12	-1.22569	0.0157619
mmu-let-7e-5p	14879	-1.24413	3.05431e-07
mmu-let-7f-5p	188047	-1.2721	3.45924e-05
mmu-miR-672-5p	136.882	-1.27642	3.39097e-07
mmu-miR-144-5p	37.4914	-1.30579	0.000369207
mmu-miR-98-3p	44.9161	-1.31303	0.00440237
mmu-miR-877-5p	272.861	-1.31526	6.22743e-09
mmu-miR-107-3p	597.143	-1.33646	9.71539e-09
mmu-miR-301b-3p	42.1762	-1.34735	0.00174324
mmu-miR-1298-5p	430.718	-1.3536	6.22743e-09
mmu-miR-26b-5p	10377.6	-1.368	2.07133e-09
mmu-miR-103-3p	10028.8	-1.39583	1.06154e-10
