# Supplementary material for: Satb2 determines miRNA expression and long-term memory in the adult central nervous system
Source: eLife. 2016 Nov 29;5:e17361. doi: 10.7554/eLife.17361 (PMC5207769; doi:10.7554/eLife.17361)
Supplement: Figure 6—source data 4. — DOI: http://dx.doi.org/10.7554/eLife.17361.021 [file elife-17361-fig6-data4.xlsx]

## Sheet: Sheet1
miRNA promoters						Satb2 peaks
chr	start	end	miRNA	distance from TSS	strand	chr	start	end	peak	overlap
chr1	23256322	23256363	mmu-mir-30a	15947	+	chr1	23256091	23256832	AAV8-Satb2_peak_94	41
chr1	74391611	74391769	mmu-mir-26b	2699	+	chr1	74391582	74392977	AAV8-Satb2_peak_396	158
chr1	86358682	86358853	mmu-mir-3535	6701	-	chr1	86358674	86359800	AAV8-Satb2_peak_500	171
chr1	153899885	153899999	mmu-mir-8114	41	+	chr1	153899776	153900414	AAV8-Satb2_peak_917	114
chr1	184845617	184845636	mmu-mir-1981	23210	-	chr1	184845548	184845717	AAV8-Satb2_peak_1139	19
chr1	184845617	184845636	mmu-mir-1981	23210	-	chr1	184845548	184845717	AAV8-Satb2_peak_1139	19
chr10	80260853	80260873	mmu-mir-6911	17311	+	chr10	80260823	80261265	AAV8-Satb2_peak_1840	20
chr10	81233127	81233205	mmu-mir-3057	38470	+	chr10	81233137	81233365	AAV8-Satb2_peak_1937	68
chr10	122985753	122985872	mmu-let-7i	113	-	chr10	122985288	122986475	AAV8-Satb2_peak_2265	119
chr10	128368396	128368416	mmu-mir-6914	14442	+	chr10	128368384	128368813	AAV8-Satb2_peak_2336	20
chr11	75166705	75166724	mmu-mir-132	6977	+	chr11	75164940	75169253	AAV8-Satb2_peak_2970	19
chr11	75166705	75166724	mmu-mir-212	6683	+	chr11	75164940	75169253	AAV8-Satb2_peak_2970	19
chr11	78037915	78038056	mmu-mir-144	35090	+	chr11	78037973	78038170	AAV8-Satb2_peak_3026	83
chr11	96271128	96271146	mmu-mir-10a	46037	+	chr11	96270932	96272481	AAV8-Satb2_peak_3264	18
chr11	120046997	120047189	mmu-mir-338	32232	-	chr11	120046581	120047503	AAV8-Satb2_peak_3795	192
chr12	87443606	87443626	mmu-mir-3068	5927	-	chr12	87443395	87443745	AAV8-Satb2_peak_4375	20
chr12	108792926	108793080	mmu-mir-345	44047	+	chr12	108792234	108794450	AAV8-Satb2_peak_4537	154
chr12	109612918	109612966	mmu-mir-370	5340	+	chr12	109612884	109613398	AAV8-Satb2_peak_4558	48
chr12	110278922	110279042	mmu-mir-1247	874	-	chr12	110278970	110279383	AAV8-Satb2_peak_4565	72
chr12	87443606	87443626	mmu-mir-3068	5927	-	chr12	87443395	87443745	AAV8-Satb2_peak_4375	20
chr12	110278922	110279042	mmu-mir-1247	874	-	chr12	110278970	110279383	AAV8-Satb2_peak_4565	72
chr13	48546129	48546149	mmu-let-7a-1	7950	-	chr13	48545702	48546449	AAV8-Satb2_peak_4951	20
chr13	48546129	48546149	mmu-let-7d	10117	-	chr13	48545702	48546449	AAV8-Satb2_peak_4951	20
chr13	48546129	48546149	mmu-let-7f-1	8300	-	chr13	48545702	48546449	AAV8-Satb2_peak_4951	20
chr13	58401508	58401568	mmu-mir-7a-1	8729	-	chr13	58401429	58402818	AAV8-Satb2_peak_5099	60
chr14	64587133	64587159	mmu-mir-124-1	3524	+	chr14	64587084	64588333	AAV8-Satb2_peak_5914	26
chr14	115040763	115040800	mmu-mir-19b-1	3542	+	chr14	115040485	115042237	AAV8-Satb2_peak_6146	37
chr14	115040763	115040800	mmu-mir-92a-1	3664	+	chr14	115040485	115042237	AAV8-Satb2_peak_6146	37
chr15	85670579	85670682	mmu-let-7b	36740	+	chr15	85670468	85672033	AAV8-Satb2_peak_6844	103
chr16	33056453	33056558	mmu-mir-1947	48908	+	chr16	33056350	33057112	AAV8-Satb2_peak_7455	105
chr17	17826526	17826546	mmu-let-7e	3826	+	chr17	17826513	17827884	AAV8-Satb2_peak_7915	20
chr17	17826526	17826546	mmu-mir-125a	4286	+	chr17	17826513	17827884	AAV8-Satb2_peak_7915	20
chr17	17826526	17826546	mmu-mir-99b	3662	+	chr17	17826513	17827884	AAV8-Satb2_peak_7915	20
chr17	25832655	25832682	mmu-mir-3082	1290	-	chr17	25832655	25833307	AAV8-Satb2_peak_8022	27
chr17	26948947	26948983	mmu-mir-3083	891	-	chr17	26948787	26949023	AAV8-Satb2_peak_8059	36
chr17	34031516	34031702	mmu-mir-219a-1	6533	-	chr17	34031687	34032437	AAV8-Satb2_peak_8234	15
chr17	35969514	35969533	mmu-mir-877	8784	-	chr17	35969494	35969804	AAV8-Satb2_peak_8295	19
chr18	61398775	61398821	mmu-mir-378a	940	-	chr18	61398501	61400210	AAV8-Satb2_peak_9257	46
chr19	46304726	46304814	mmu-mir-146b	38036	+	chr19	46304756	46305092	AAV8-Satb2_peak_10000	58
chr19	60790573	60790744	mmu-mir-3084-2	16244	-	chr19	60789952	60790784	AAV8-Satb2_peak_10138	171
chr2	29889440	29889460	mmu-mir-219a-2	43809	-	chr2	29889206	29890072	AAV8-Satb2_peak_10382	20
chr2	45045607	45045626	mmu-mir-5129	22507	-	chr2	45045580	45045892	AAV8-Satb2_peak_10589	19
chr2	84743030	84743050	mmu-mir-130a	1915	-	chr2	84743035	84743643	AAV8-Satb2_peak_10821	15
chr2	131262474	131262611	mmu-mir-103-2	25578	+	chr2	131262416	131262585	AAV8-Satb2_peak_11145	111
chr2	180893128	180893164	mmu-mir-124-3	912	+	chr2	180892897	180894569	AAV8-Satb2_peak_11732	36
chr2	45045607	45045626	mmu-mir-5129	22507	-	chr2	45045580	45045892	AAV8-Satb2_peak_10589	19
chr3	17786617	17786636	mmu-mir-124-2	9045	+	chr3	17786593	17786753	AAV8-Satb2_peak_11813	19
chr3	88200544	88200703	mmu-mir-3093	14627	+	chr3	88200423	88200788	AAV8-Satb2_peak_12182	159
chr3	118433760	118433806	mmu-mir-137	97	+	chr3	118433727	118434048	AAV8-Satb2_peak_12473	46
chr3	157534106	157534174	mmu-mir-186	10173	+	chr3	157534037	157534824	AAV8-Satb2_peak_12690	68
chr4	88094595	88094686	mmu-mir-491	27445	+	chr4	88094680	88095033	AAV8-Satb2_peak_13127	6
chr4	101356109	101356186	mmu-mir-101a	9164	-	chr4	101355569	101356198	AAV8-Satb2_peak_13186	77
chr4	121016887	121016918	mmu-mir-7015	43628	-	chr4	121016698	121017308	AAV8-Satb2_peak_13380	31
chr4	138325835	138326161	mmu-mir-7019	9703	-	chr4	138326031	138326334	AAV8-Satb2_peak_13743	130
chr4	88094595	88094686	mmu-mir-491	27445	+	chr4	88094680	88095033	AAV8-Satb2_peak_13127	6
chr5	24586735	24586877	mmu-mir-671	5379	+	chr5	24586746	24586904	AAV8-Satb2_peak_14333	131
chr5	139380587	139380607	mmu-mir-339	10937	-	chr5	139380571	139380905	AAV8-Satb2_peak_15499	20
chr6	30173647	30173679	mmu-mir-182	7729	-	chr6	30173629	30174295	AAV8-Satb2_peak_15867	32
chr6	30173647	30173679	mmu-mir-183	3979	-	chr6	30173629	30174295	AAV8-Satb2_peak_15867	32
chr6	30693950	30693971	mmu-mir-335	47349	+	chr6	30693846	30694033	AAV8-Satb2_peak_15872	21
chr6	124745545	124745565	mmu-mir-141	27631	-	chr6	124745402	124746008	AAV8-Satb2_peak_16511	20
chr6	30173647	30173679	mmu-mir-182	7729	-	chr6	30173629	30174295	AAV8-Satb2_peak_15867	32
chr6	30173647	30173679	mmu-mir-183	3979	-	chr6	30173629	30174295	AAV8-Satb2_peak_15867	32
chr7	19176639	19176708	mmu-mir-330	4826	+	chr7	19176482	19176650	AAV8-Satb2_peak_16933	11
chr7	24997096	24997114	mmu-mir-7046	27086	-	chr7	24997099	24997475	AAV8-Satb2_peak_17023	15
chr7	99535436	99535461	mmu-mir-326	16833	+	chr7	99535247	99535950	AAV8-Satb2_peak_17775	25
chr7	100894553	100894827	mmu-mir-3102	12247	-	chr7	100894405	100894646	AAV8-Satb2_peak_17788	93
chr7	24997096	24997114	mmu-mir-7046	27086	-	chr7	24997099	24997475	AAV8-Satb2_peak_17023	15
chr8	70754588	70754860	mmu-mir-7240	43547	+	chr8	70754804	70754999	AAV8-Satb2_peak_18680	56
chr8	84183765	84183812	mmu-mir-181c	4892	-	chr8	84183571	84183805	AAV8-Satb2_peak_18848	40
chr8	84183765	84183812	mmu-mir-181d	5049	-	chr8	84183571	84183805	AAV8-Satb2_peak_18848	40
chr8	84200863	84200922	mmu-mir-24-2	7952	+	chr8	84200772	84201437	AAV8-Satb2_peak_18850	59
chr8	84200863	84200922	mmu-mir-27a	7809	+	chr8	84200772	84201437	AAV8-Satb2_peak_18850	59
chr9	106170872	106171013	mmu-let-7g	7968	+	chr9	106170653	106171642	AAV8-Satb2_peak_20321	141
chr9	108560144	108560166	mmu-mir-425	8633	+	chr9	108560153	108560587	AAV8-Satb2_peak_20384	13
chr9	110245089	110245206	mmu-mir-6236	36198	+	chr9	110245159	110245650	AAV8-Satb2_peak_20416	47
chrX	52782964	52782991	mmu-mir-19b-2	40981	-	chrX	52782793	52782997	AAV8-Satb2_peak_20761	27
chrX	52782964	52782991	mmu-mir-92a-2	41126	-	chrX	52782793	52782997	AAV8-Satb2_peak_20761	27
chrX	53057136	53057236	mmu-mir-322	2881	-	chrX	53057053	53057415	AAV8-Satb2_peak_20764	100
chrX	53057136	53057236	mmu-mir-351	3881	-	chrX	53057053	53057415	AAV8-Satb2_peak_20764	100
chrX	103616866	103616917	mmu-mir-421	43945	-	chrX	103616759	103617034	AAV8-Satb2_peak_20915	51
chrX	140277604	140277624	mmu-mir-3475	33344	+	chrX	140277609	140278802	AAV8-Satb2_peak_20984	15
chrX	52782964	52782991	mmu-mir-19b-2	40981	-	chrX	52782793	52782997	AAV8-Satb2_peak_20761	27
chrX	52782964	52782991	mmu-mir-92a-2	41126	-	chrX	52782793	52782997	AAV8-Satb2_peak_20761	27
