# Supplementary material for: Satb2 determines miRNA expression and long-term memory in the adult central nervous system
Source: eLife. 2016 Nov 29;5:e17361. doi: 10.7554/eLife.17361 (PMC5207769; doi:10.7554/eLife.17361)
Supplement: Figure 7—source data 1. — The miRNAs identified as up-regulated in the CA1 region of Satb2 cKO vs. control mice are shown in red. DOI: http://dx.doi.org/10.7554/eLife.17361.026 [file elife-17361-fig7-data1.xlsx]

## Sheet: Sheet1
miRNA target prediction algorithms	Mouse miRs predicted to target Arc 3'UTR (NM_018790)
TargetScan	miR-19ab, miR-214/761/3619-5p, miR-138, let-7/98/4458/4500, miR-135ab/135a-5p, miR-182, miR-193, miR-204/204b/211, miR-192/215, miR-324-5p, miR-329/329ab/362-3p, miR-149, miR-874, miR-202-3p, miR-376abd/376b-3p, miR-491-5p, miR-504/4725-5p, miR-28-5p/708/1407/1653/3139, miR-496, miR-346, miR-495/1192, miR-431, miR-488
PITA	miR-125a-3p, miR-671-5p, miR-673-3p, miR-764-3p, miR-574-5p, miR-323-5p, miR-666-5p, miR-540-3p, miR-331-3p, miR-770-3p, miR-380-3p, miR-423-5p, miR-324-5p, miR-139-3p, miR-129-5p, miR-423-3p, miR-342-5p, miR-409-5p, miR-673-5p, miR-666-3p, miR-151-3p, miR-338-3p, miR-540-5p, miR-671-3p, miR-125a-5p, miR-151-5p, miR-582-5p, miR-296-5p, miR-34b-5p, miR-450a-5p, miR-380-5p, miR-339-5p, miR-125b-5p,…
miRanda-mirSVR	miR-19a, miR-19b, miR-182, miR-135a, miR-135b, miR-149, miR-185, miR-34c, miR-376b, miR-218, miR-203, miR-214, miR-761, miR-128, miR-495, miR-1192, miR-329, miR-362-3p, miR-138, miR-106a, miR-17, miR-20a, miR-20b, miR-24, miR-200c, miR-33, miR-291a-3p
