# Supplementary material for: Satb2 determines miRNA expression and long-term memory in the adult central nervous system
Source: eLife. 2016 Nov 29;5:e17361. doi: 10.7554/eLife.17361 (PMC5207769; doi:10.7554/eLife.17361)
Supplement: Supplementary file 1. — DOI: http://dx.doi.org/10.7554/eLife.17361.027 [file elife-17361-supp1.xlsx]

## Sheet: Sheet1
Gene Name	Forward Primer (5'-3')	Reverse Primer (5'-3')
Satb2	CCGCACACAGGGATTATTGTC	TCCACTTCAGGCAGGTTGAG
Arc	CCAGCAGTGATTCATACCAGTG	TCAGCAGCCTTGAGACCTG
Gapdh	AGGGCTCATGACCACAGTC	CAGCTCTGGGATGACCTTG
Ghsr	GAAGATGCTTGCTGTGGTGG	GTAGAAGAGGACAAAGGACAC
Adra2a	CTGGTTGTTGTGGTTGTTCCC	CTAGTACTGTGCTTGCTCTGAAG
Penk	CGACATCAATTTCCTGGCGTG	CTCTCATCCTGTTTGCTGCTG
Htr5b	ACCACGCAGGCAAAGGAAG	AAAGCACAAACACGCCAATCAAG
Calb1	TAGGAATTGTAGAGTTGGCTCAC	CTGTGGTCAGTATCATACTTTCTC
Sema3A	CATCGGAACAGATGTTGGAACC	TGTACAGCTGTTGCTGTTTAGTAG
Crym	GGTGTCTGCCATTGCCACA	CCTTGAAGGAGAACTGCTCTG
Nt5dc3	AGATGCAGGTCCACAGAGAC	TTCGGAACAAGCTCCCAAACT
Zfp423	GATCGGTGAAAGTTGAAGAGGG	CTTGACTTGTCACGCTGTTCC
Nrip3	CCAAGCAGCTGTGGTTGATGATA	GCTTCTGAAGTGTTGTCGTC
chr11:75445577-75445691_miR-22	TCCTTGCTGCCACTCAGAAAG	ATGCCCACTTCCACTTCCAC
chr8:122567851-122567986_Cdt1	CCCATTCTCGGTCCTCAATC	GTACCACCACGCACAGTTCT
chr5:53589335-53589511_Rbpj	GTGTTGTGTCTGAGCCGAG	GCAGGGAGCCACAAAAAACC
chr19:5803617-5803795_Malat1	AGTCGCCGCCTCCCTTTGT	TCCCACACCAGTCATTCCAG
chr5:149051875-149051960_Hmgb1	CGAGAATATGGCTCCTTCCCT	TCGGTCTCCTCGCACACTCA
chr11:3165512-3165728_Sfi1	CAACAAGCAGCAGCAGAGAG	GTGAGTTCCCCCAACCCAG
