# Supplementary figures and images for: Satb2 determines miRNA expression and long-term memory in the adult central nervous system
Source: eLife journal article supplement (doi:10.7554/elife.17361), 2016-11-29

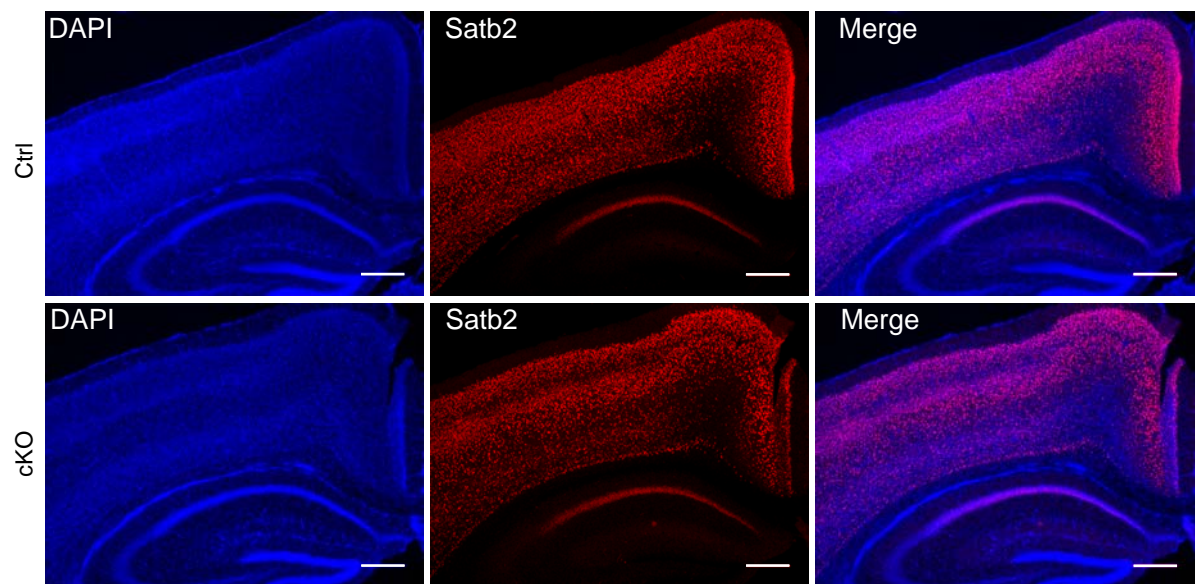

Supplement: supp [file elife_poa_e17361_Figure_1_figure_supplement_1.pdf › elife_poa_e17361_Figure_1_figure_supplement_1.pdf]

**A**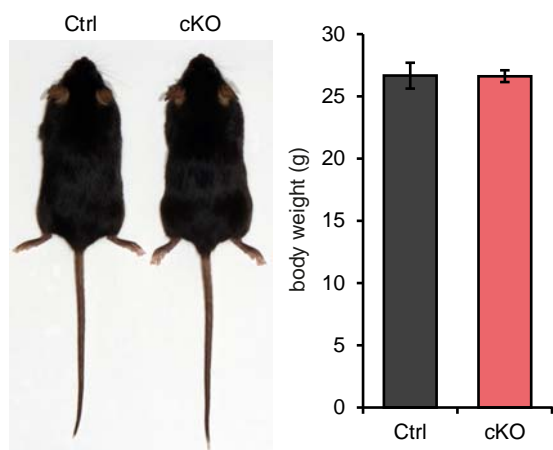**B**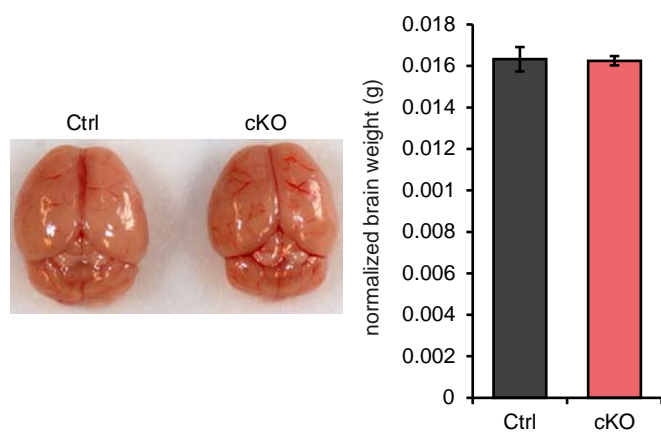**C**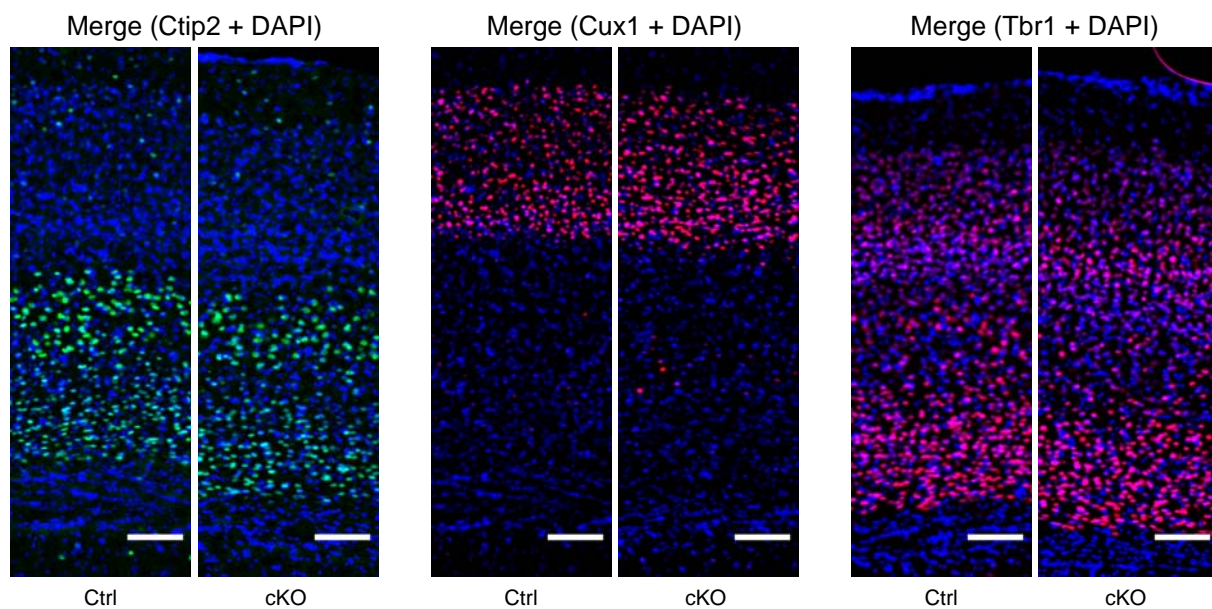

Supplement: supp [file elife_poa_e17361_Figure_1_figure_supplement_2.pdf › elife_poa_e17361_Figure_1_figure_supplement_2.pdf]

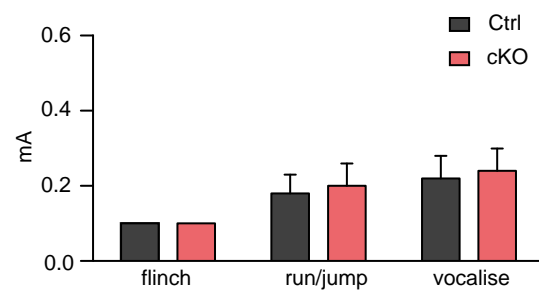

Supplement: supp [file elife_poa_e17361_Figure_2_figure_supplement_1.pdf › elife_poa_e17361_Figure_2_figure_supplement_1.pdf]

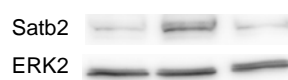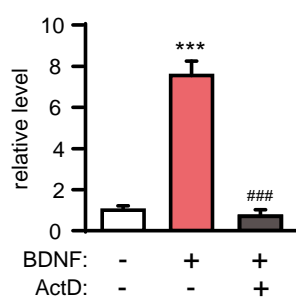

Supplement: supp [file elife_poa_e17361_Figure_4_figure_supplement_1.pdf › elife_poa_e17361_Figure_4_figure_supplement_1.pdf]

A

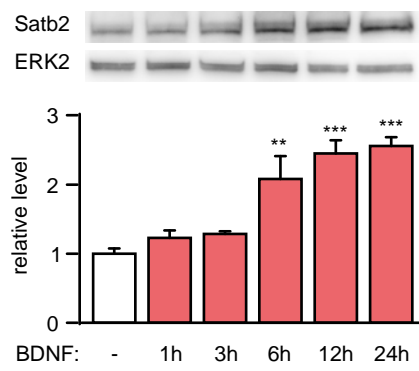

B

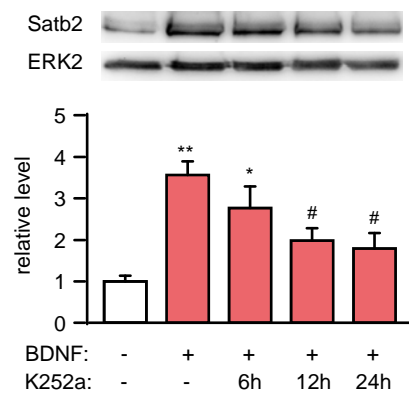

Supplement: supp [file elife_poa_e17361_Figure_4_figure_supplement_2.pdf › elife_poa_e17361_Figure_4_figure_supplement_2.pdf]

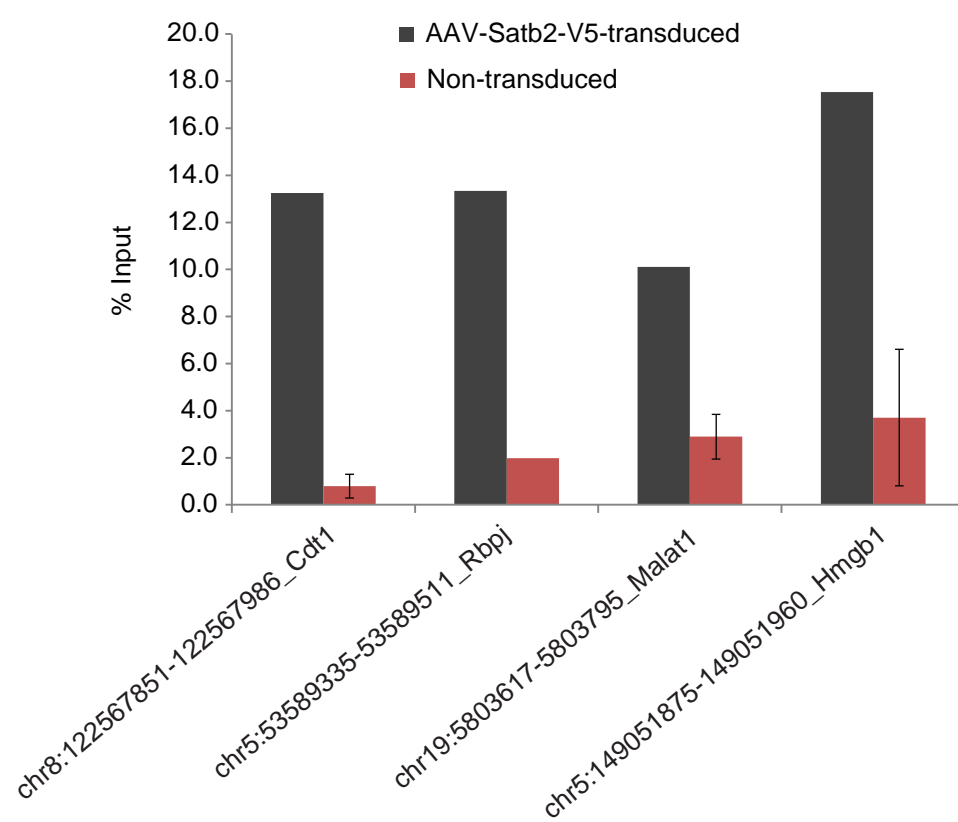

Supplement: supp [file elife_poa_e17361_Figure_5_figure_supplement_1.pdf › elife_poa_e17361_Figure_5_figure_supplement_1.pdf]

**A**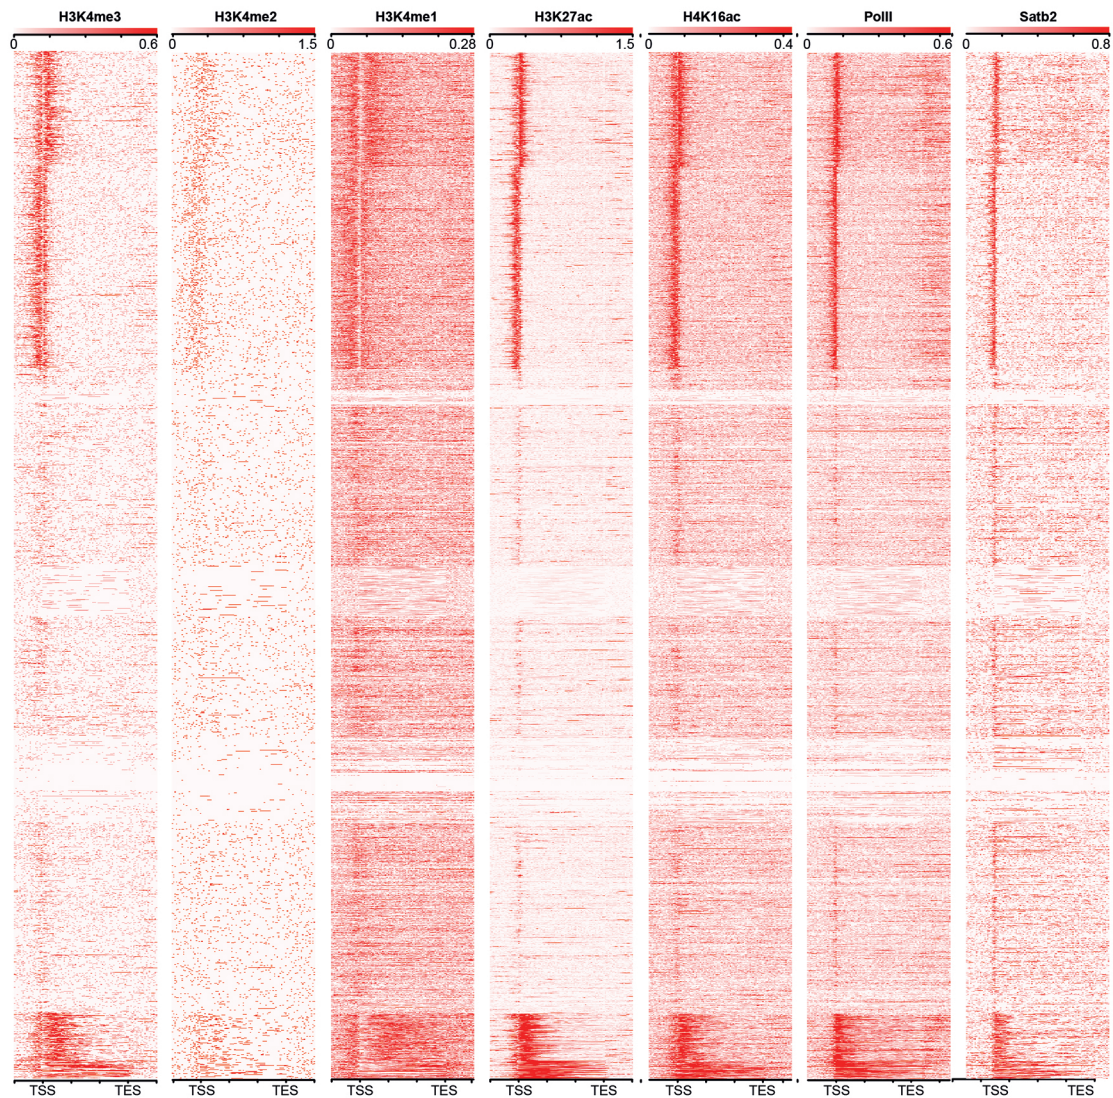**B**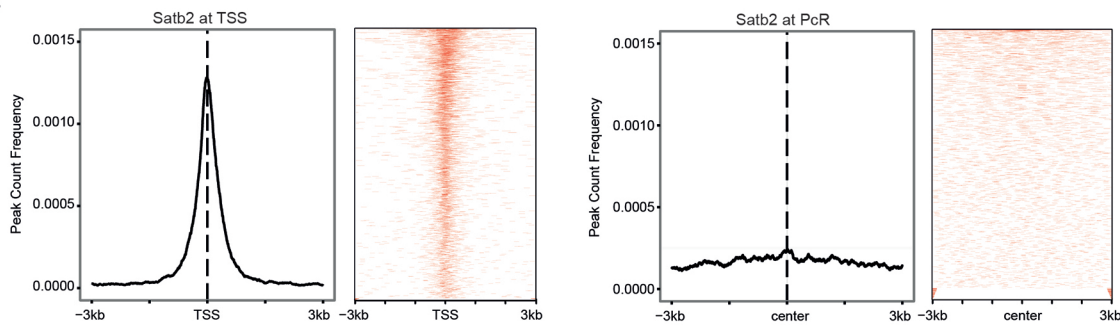

Supplement: supp [file elife_poa_e17361_Figure_5_figure_supplement_2.pdf › elife_poa_e17361_Figure_5_figure_supplement_2.pdf]

**A**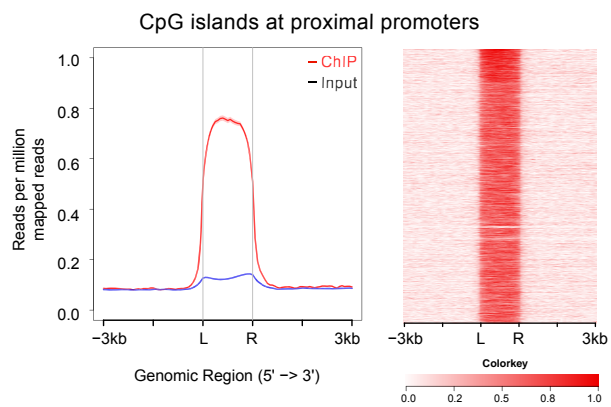**B**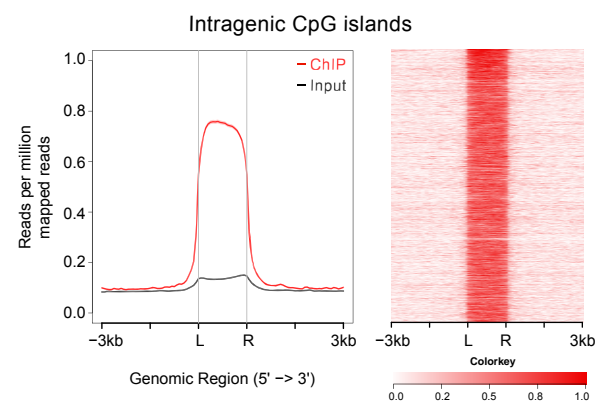**C**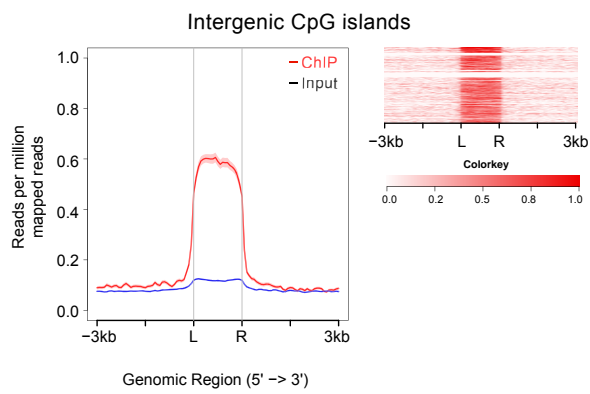**D**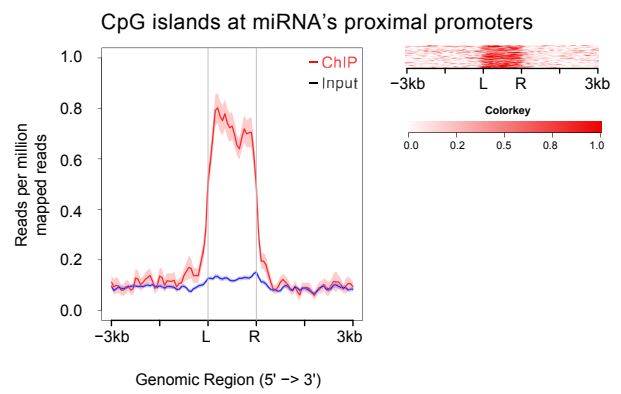

Supplement: supp [file elife_poa_e17361_Figure_5_figure_supplement_3.pdf › elife_poa_e17361_Figure_5_figure_supplement_3.pdf]

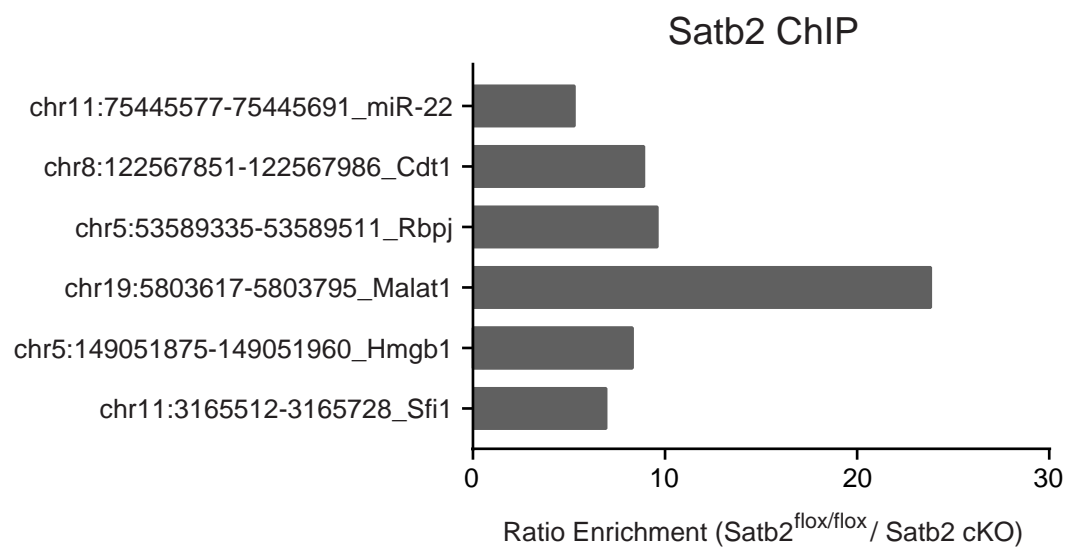

Supplement: supp [file elife_poa_e17361_Figure_5_figure_supplement_4.pdf › elife_poa_e17361_Figure_5_figure_supplement_4.pdf]

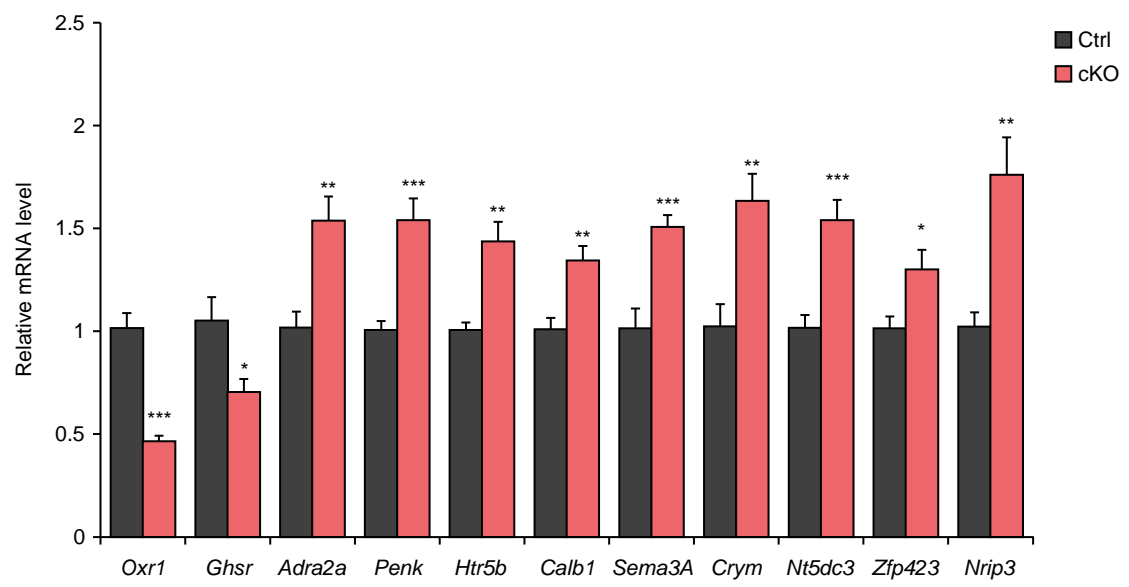

Supplement: supp [file elife_poa_e17361_Figure_6_figure_supplement_1.pdf › elife_poa_e17361_Figure_6_figure_supplement_1.pdf]

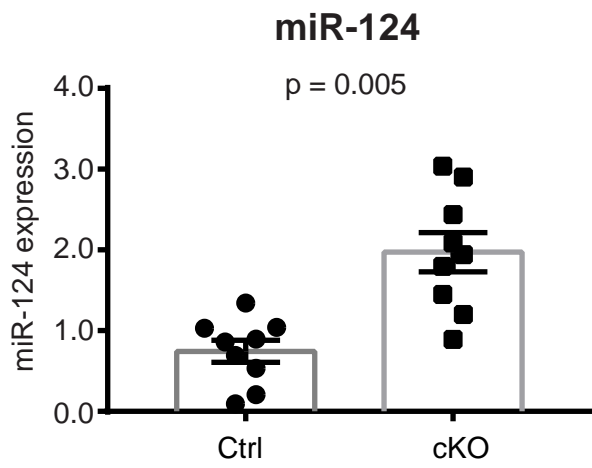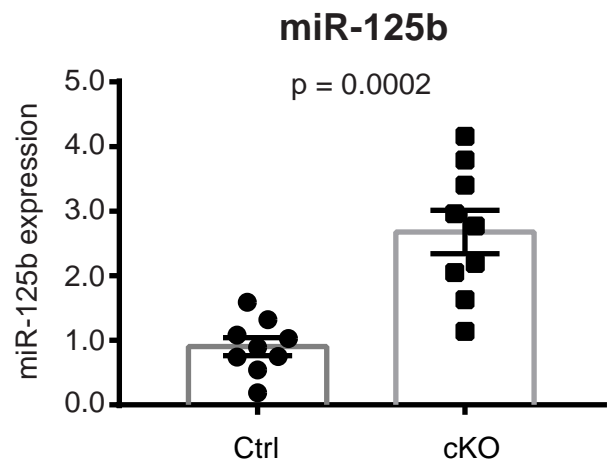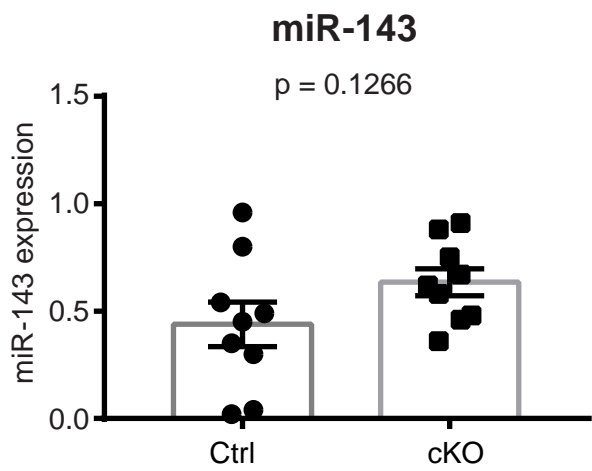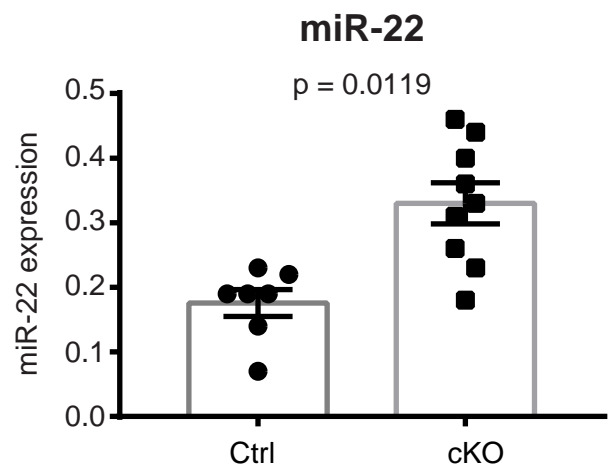

Supplement: supp [file elife_poa_e17361_Figure_6_figure_supplement_2.pdf › elife_poa_e17361_Figure_6_figure_supplement_2.pdf]

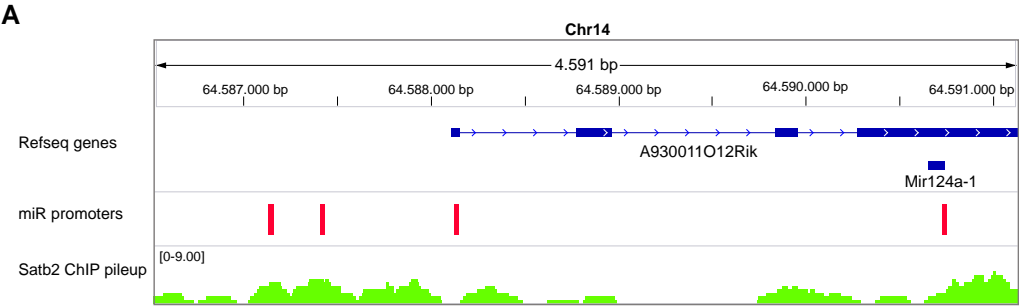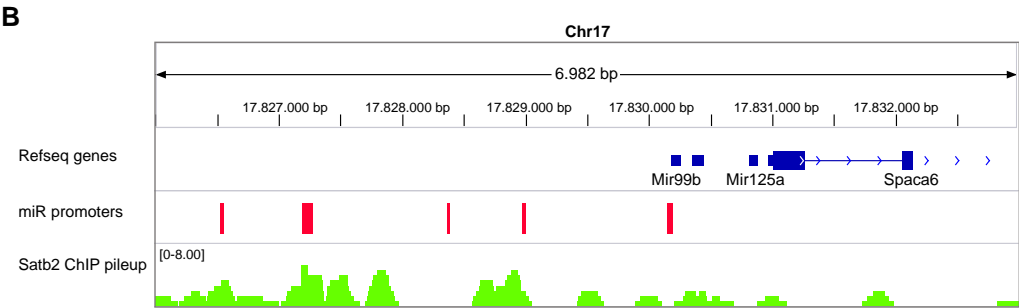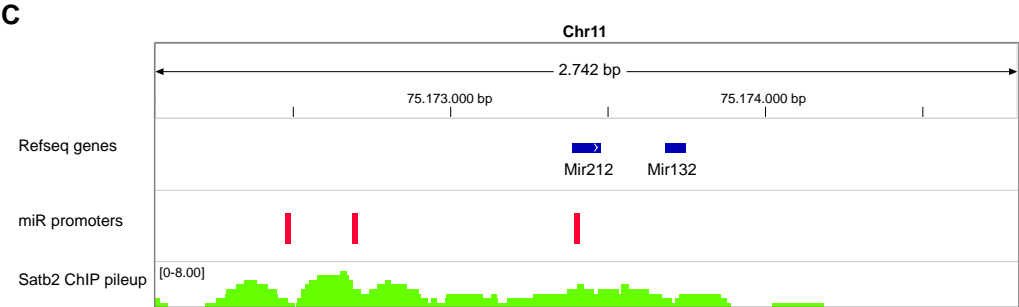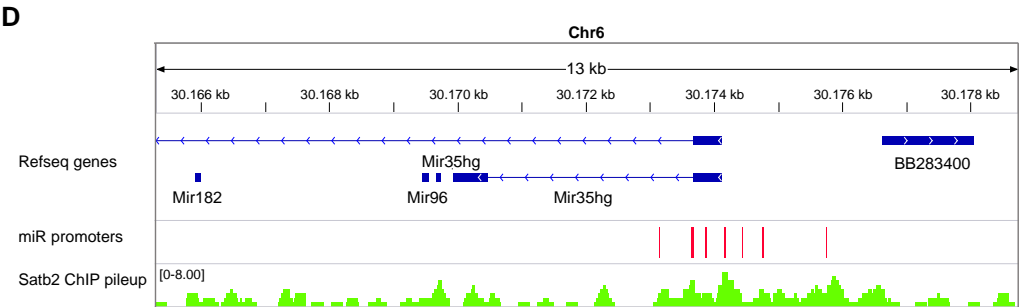

Supplement: supp [file elife_poa_e17361_Figure_6_figure_supplement_3.pdf › elife_poa_e17361_Figure_6_figure_supplement_3.pdf]
